# Supplementary material for: miR-33 controls the expression of biliary transporters, and mediates statin- and diet-induced hepatotoxicity
Source: PubMed Central journal article supplement (PMC3491822; doi:10.1002/emmm.201201228), 2012-07-05
Supplement: emmm0004-0882-SD2.pdf [file emmm0004-0882-SD2.pdf]

**SUPPORTING INFORMATION related to**

**miR-33 controls the expression of biliary transporters, and mediates statin- and diet-induced hepatotoxicity**

Ryan M. Allen, Tyler J. Marquart, Carolyn J. Albert, Frederick J. Suchy, David Q.-H. Wang, Meenakshisundaram Ananthanarayanan, David A. Ford, and Ángel Baldán

**Table of contents**

|                                 |    |
|---------------------------------|----|
| Supporting Figure Legends ..... | 2  |
| Supporting Figures .....        | 5  |
| Supporting References .....     | 11 |

## SUPPORTING FIGURE LEGENDS

**Figure S1. Expression profile of selected hepatic genes following treatment with anti-miR-33 oligonucleotides.** C57BL/6 mice (n=5) were injected with saline, or scrambled or anti-miR-33 oligonucleotides (5 mpk i.v., for 3 consecutive days), fed chow for 7 days, and then fasted overnight before sacrifice. Relative hepatic mRNA expression of genes involved in bile metabolism and of two previously described miR-33 targets were determined by real time qPCR. Data are shown as mean  $\pm$  SD; \*\*  $P < 0.01$

**Figure S2. Bile acid secretion and synthesis are decreased in cells overexpressing miR-33.** HuH7 cells were seeded in 24-well plates and transduced with empty (open bars) or miR-33 (closed bars) adenovirus. The next morning, cells were pulsed in media supplemented with 0.2% BSA and cyclodextran:cholesterol spiked with [<sup>14</sup>C]-cholesterol (prepared as described in Christian *et al.*, 1997). The final specific activity in the media was 2  $\mu$ Ci/mL. After 6 h, cells were washed in PBS and chased in fresh media supplemented with 0.2% BSA for 24 or 48 h. Chloroform- and water-soluble radiolabeled sterols (cholesterol and bile acids, respectively) were separated as described in Methods for the RCT experiment. Figure shows data from 8 replicas per condition. \*\*  $P < 0.01$  miR-33 vs. empty; <sup>§</sup> 48 h vs. 24 h.

**Figure S3. Hepatic expression of selected genes involved in lipid metabolism in mice overexpressing miR-33.**

**A.** C57BL/6 mice (n=5) were transduced with empty or miR-33 encoding adenovirus vectors and then switched to a lithogenic diet, as described in *Fig. 3*. The relative abundance of selected genes was determined by real time qPCR.

**B.** Potential miR-33 response element in the 3'UTR of mouse and human *SREBP-1*. Asterisks denote complementarity to miR-33.

**C.** The 3'UTR of mouse *Srebp-1*, or the potential murine miR-33 responsive element shown in panel B were cloned downstream of a luciferase reporter. The effect of miR-33 overexpression on Luc activity was assayed as described in *Fig. 2*. Negative control (empty luc vector) and a positive control (reporter containing a 100% match to miR-33) were also included in these experiments.

**D.** Nuclear extracts were prepared from the livers of the same mice (as described in Sheng et al, 1995). Pieces from 2 livers were pooled to generate each nuclear extract sample. Fifty  $\mu\text{g}$  of total protein were separated by SDS-PAGE and probed with antibodies against the mature SREBP1, and  $\beta$ -actin.

**E.** C57BL/6 mice (n=5) were transduced with empty or miR-33 encoding adenovirus vectors and kept on a standard chow diet. The relative abundance of selected genes was determined by real time qPCR. Data are shown as mean  $\pm$  SD; nd, not detected; \*  $P < 0.05$ ; \*\*  $P < 0.01$ ; nd, not detected.

**Figure S4. Analysis of mouse and human *ABCG5* and *ABCG8* as potential direct targets of miR-33.**

**A.** Human HepG2 and Huh7 hepatoma cells were transduced with empty or miR-33- encoding adenovirus, and the expression of *ABCG5* and *ABCG8* was measured 48 h later by real time qPCR.

**B.** The 3'UTR of mouse and human *ABCG5* and *ABCG8* were amplified from genomic DNA and cloned downstream of a luciferase reporter. The effect of miR-33 overexpression on Luc activity was assayed as described in *Fig. 2*. Negative control (empty luc vector) and a positive control (reporter containing a 100% match to miR-33) were also included in these experiments.

**C.** Human Huh7 hepatoma cells were transduced with empty or miR-33-encoding adenovirus, and then incubated in the presence or absence of agonists for LXR:RXR [T0901317:9-*cis*-retinoic acid; 1 $\mu\text{mol/L}$  each] for 48 h. The protein levels of ABCA1 and *ABCG5* were measured by Western blot using 50  $\mu\text{g}$  of total protein extract.

**D.** Analysis of the 3'UTR of human and mouse *ABCG5* and *ABCG8*. Sequences in red and underlined are partially complementary to the seed sequence of miR-33. Sequences in italics and underlined are polyA signals. Data are shown as mean  $\pm$  SD; \*  $P < 0.05$ ; \*\*  $P < 0.01$ .

**Figure S5. Simvastatin and lithogenic diet induce liver toxicity.**

**A.** C57BL/6 mice (n=4) were gavaged with simvastatin and kept on chow for a week. The expression of miR-33 was normalized to that of U6 snRNA

**B.** C57BL/6 mice (n=4) were gavaged with simvastatin and fed a lithogenic diet as described in *Fig. 6*. The expression of miR-33 was normalized to that of U6 snRNA.

**C.** Daily body weight change (n=6).

**D.** Daily average food consumption (n=6).

**E.** Lipidomics analysis of hepatic contents (n=3) was performed by ESI-M. Individual molecular species were quantified by comparisons to the internal standards as described in Methods.

**F.** Lipidomics analysis of plasma (n=3).

Data are shown as mean  $\pm$  SD.

**Figure S6. Silencing miR-33 rescues the liver damage induced by simvastatin and lithogenic diet.** C57BL/6 mice (n=12) were injected with scrambled or anti-miR-33 oligonucleotides, and subsequently dosed with simvastatin and fed a lithogenic diet, as described in *Fig. 7*.

**A.** Relative expression of miR-33, normalized to U6 snRNA (n=4).

**B.** Lipidomics analysis of hepatic contents (n=3) was performed by ESI-MS. Individual molecular species were quantified by comparisons to the internal standards as described in Methods.

**C.** Lipidomics analysis of plasma (n=3).

**D.** Relative expression of detoxifying genes in the same mice (n=5 for each group of scrambled; n=10 for the anti-miR-33 group). The expression of *Oatp4* and *Car* was significantly higher in the antisense group, compared to both scrambled groups. The expression of most transcripts, with the exception of *Cyp3a11* and *Mrp4*, was significantly decreased in the moribund group.

Data are shown as mean  $\pm$  SD.

SUPPORTING FIGURES

**Figure S1**

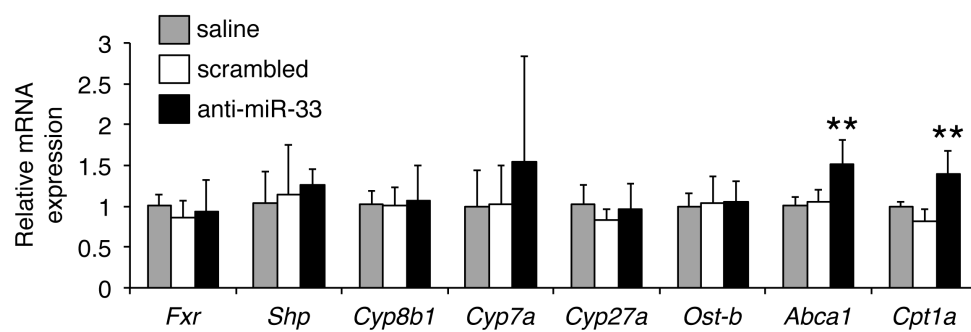

Figure S2

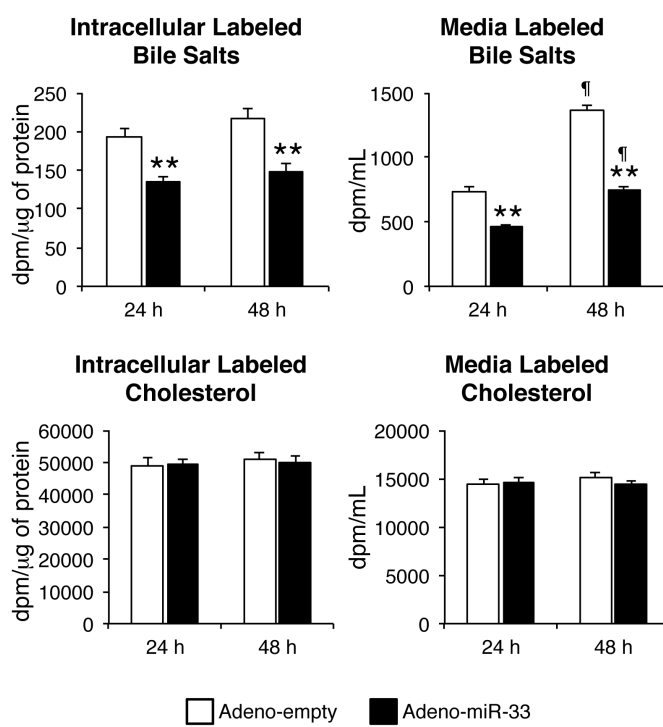

Figure S3

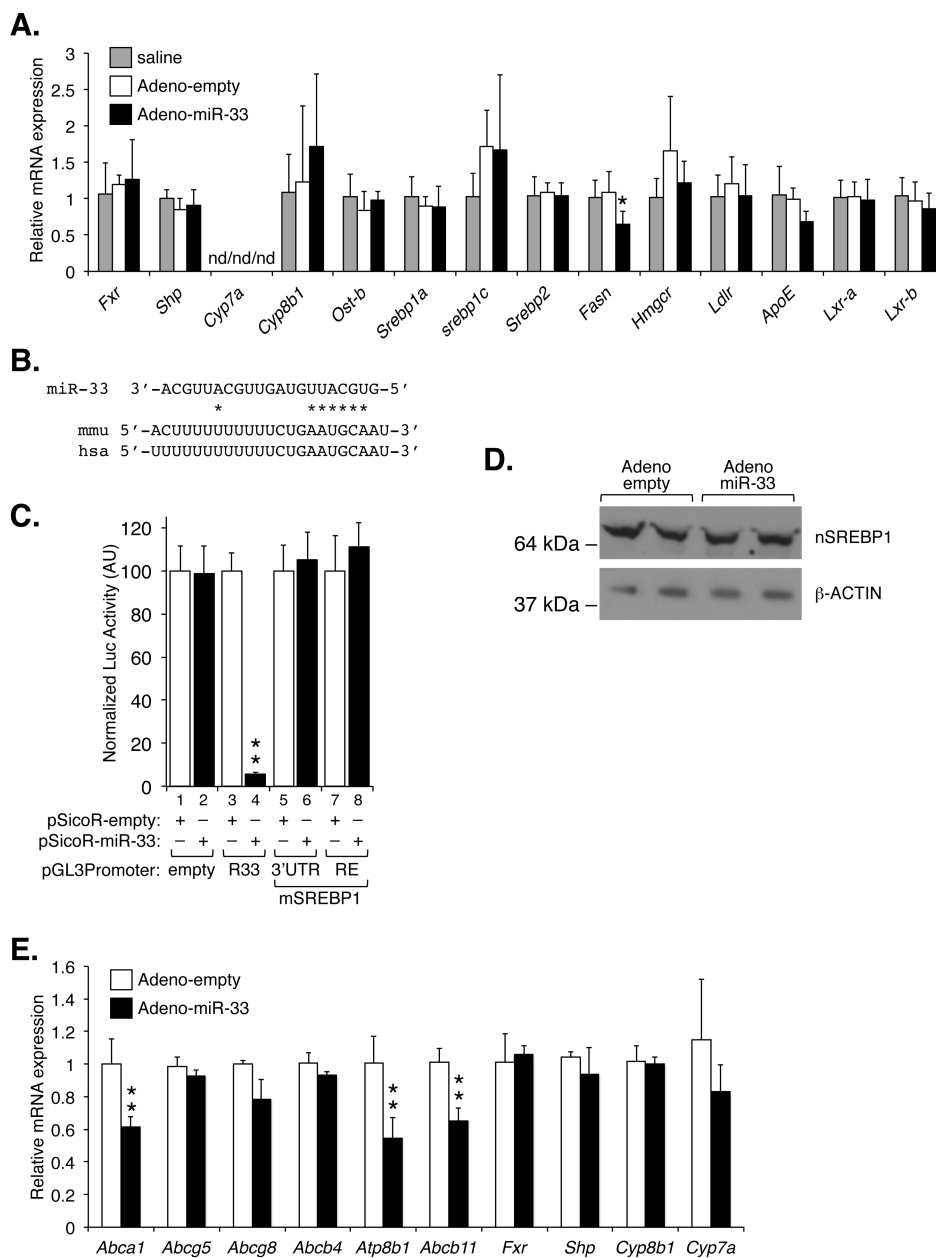

S





Figure S5

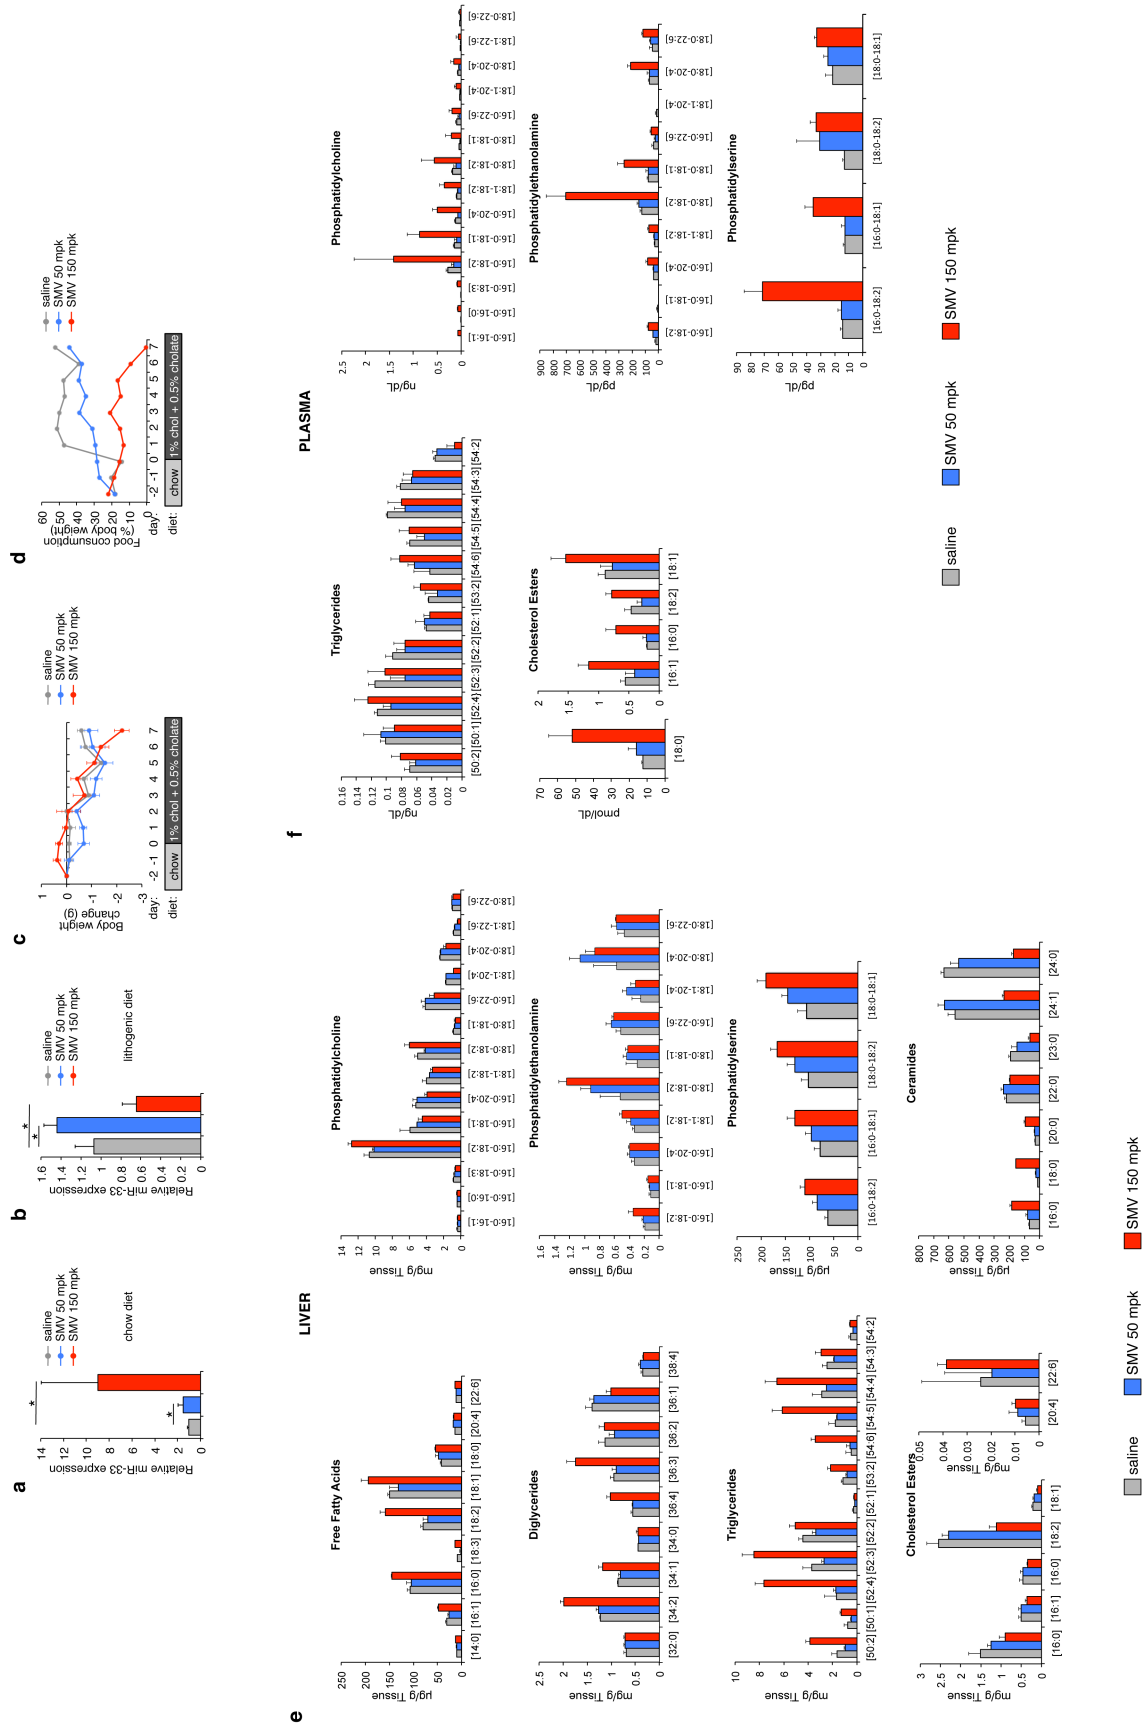

Figure S6

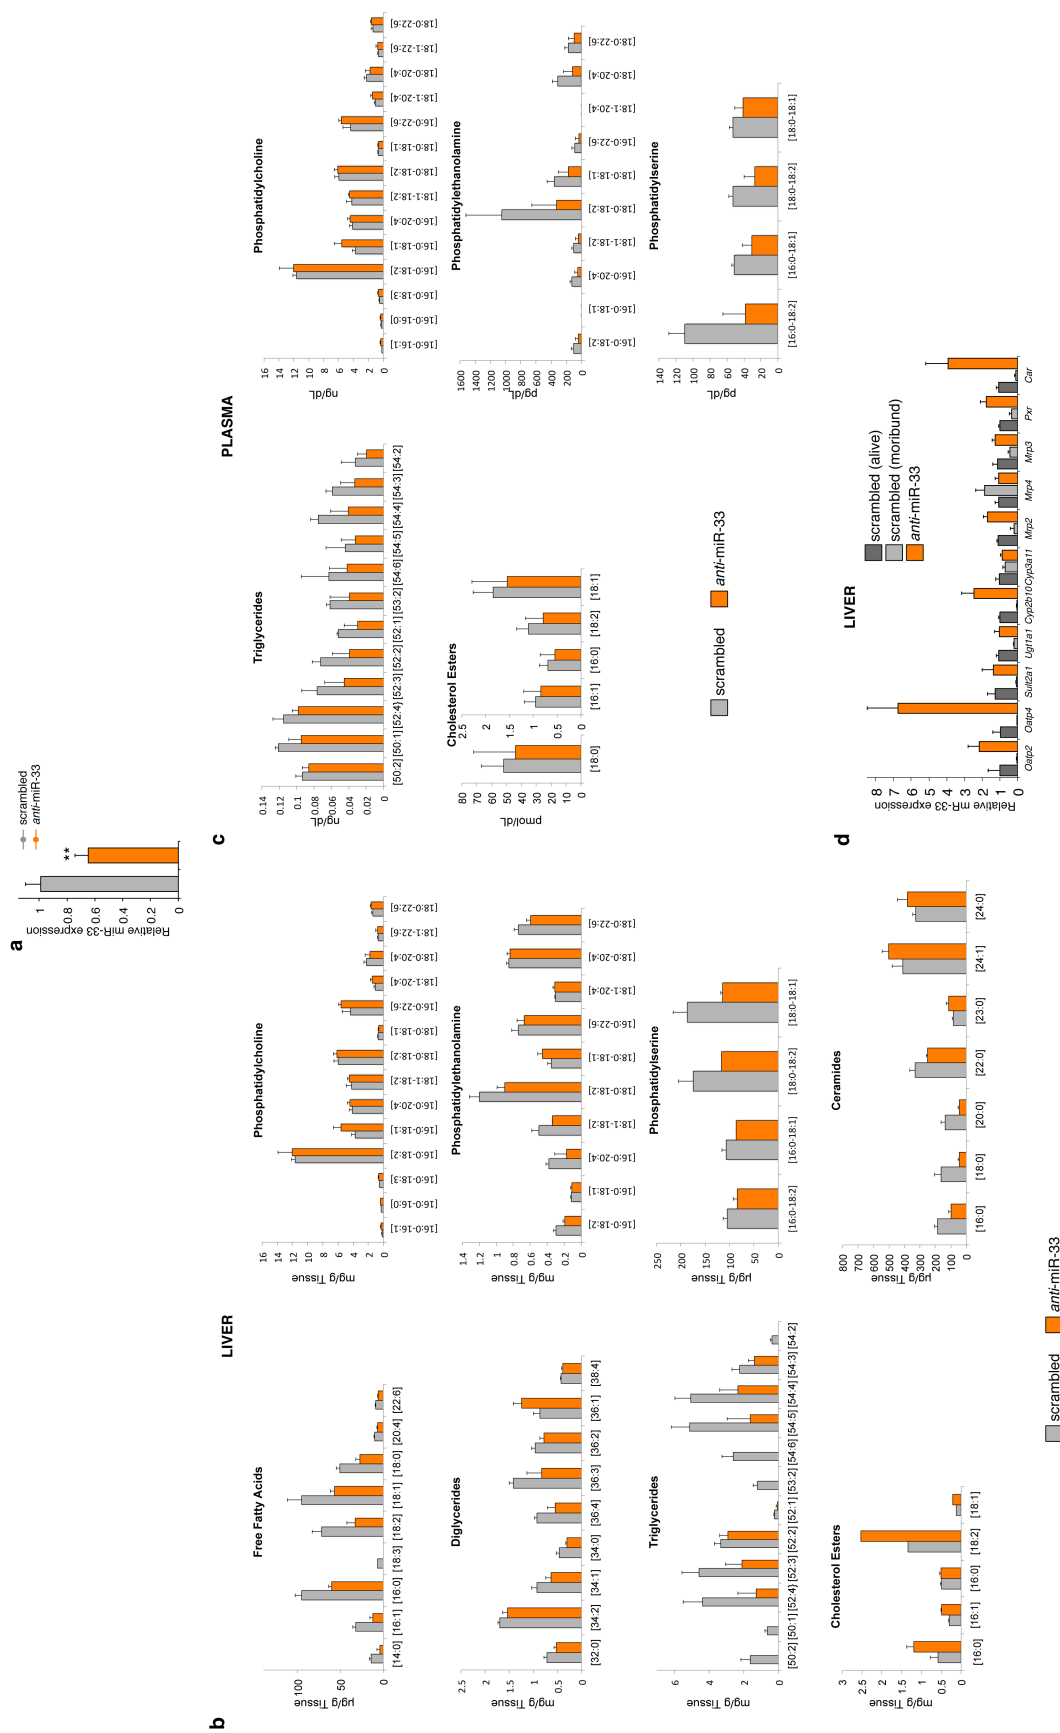

## **SUPPORTING REFERENCES**

Christian AE, Haynes MP, Phillips MC, Rothblat GH (1997) Use of cyclodextrins for manipulating cellular cholesterol content. *J Lipid Res* 38:2264-2272.

Sheng Z, Otani H, Brown MS, Goldstein JL (1995) Independent regulation of sterol regulatory element-binding proteins 1 and 2 in hamster liver. *Proc. Natl. Acad. Sci. USA* 92: 935-938.
